# Supplementary material for: Genome-wide analysis reveals a role for TDG in estrogen receptor-mediated enhancer RNA transcription and 3-dimensional reorganization
Source: PubMed Central journal article supplement (PMC5787930; doi:10.1186/s13072-018-0176-2), 2018-01-29
Supplement: 13072_2018_176_MOESM6_ESM.pdf [file 13072_2018_176_MOESM6_ESM.pdf]

| Rank | Motif                                                                                                                                                                                                                                                                                                                                                                                                 | Name                        | P-value  | % of Targets Sequences with Motif |
|------|-------------------------------------------------------------------------------------------------------------------------------------------------------------------------------------------------------------------------------------------------------------------------------------------------------------------------------------------------------------------------------------------------------|-----------------------------|----------|-----------------------------------|
| 1    |  The image shows a sequence logo for the motif AGAGGAAGTG. The letters are colored: A (green), G (yellow), A (green), G (yellow), G (yellow), A (green), A (green), G (yellow), T (red), G (yellow). Below each letter are horizontal bars representing the relative frequency of each nucleotide at that position. | PU.1(ETS)/Thio<br>Mac-PU.1- | 1.00E-02 | 11.43%                            |
