# Supplementary material for: Genome-wide analysis reveals a role for TDG in estrogen receptor-mediated enhancer RNA transcription and 3-dimensional reorganization
Source: PubMed Central journal article supplement (PMC5787930; doi:10.1186/s13072-018-0176-2), 2018-01-29

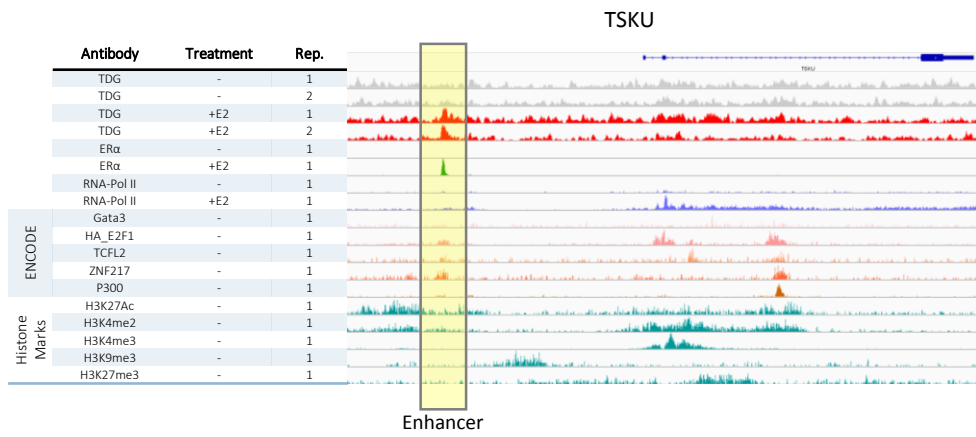

Supplement: 13072_2018_176_MOESM8_ESM.pdf [file 13072_2018_176_MOESM8_ESM.pdf]
